# Supplementary material for: Exploring Barriers to One Health Antimicrobial Stewardship in Sri Lanka: A Qualitative Study among Healthcare Professionals
Source: MDPI journal article supplement (doi:10.3390/antibiotics11070968), 2022-07-19
Supplement: s1 [file s1]

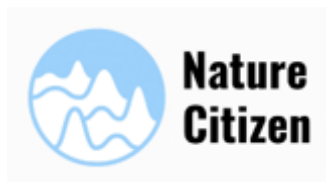

## **Interview guide**

### **Introduction**

- *Introduce yourself and introduce the study and tell what the interview will be for.*  
*- This interview is part of an international, collaborative project undertaken by the University of Peradeniya and the Royal Veterinary College, University of London.*  
*Information collected from this interview will be used for this project only and will not be shared with anyone for any other purpose; your identity will remain anonymous.*
- *Ask permission to record the interview on tape.*

### **Q1. Can you talk about AMR in your professional life?**

- Please use examples of how you found out about AMR and how AMR affect your daily work?
- Have you had any negative experiences with resistance? / Have you ever come across a case where antibiotics have not been effective in treating?
- What are the factors contributing to AMR?
- How do you see in the future, resistance impacting on your practice?

### **Q2. AMR is rising in Sri Lanka and what are your thoughts about how it spreads?**

- Please use examples of how it can spread between people, animals and the environment?

### **Q3. How do you think antimicrobial resistance could be reduced or overcome?**

- Could you describe the strategies that may be useful to help decrease antibiotic use in Sri Lanka?
- What will be the benefits of implementing an antimicrobial stewardship program in Sri Lanka?
- What are the barriers to successfully implementing programs in Sri Lanka?
- What are your thoughts about the training of healthcare professionals regarding AMR?

### **Finalizing interview**

- *Ask if they have any additional comments on what was said during the interview*
- *Ask the interviewee to introduce themselves including age, the highest level of education and years of service in their job?*
- *Thanking the interviewee for spending their time with you*
